# Supplementary material for: Artificial Neural Network Modeling of Glass Transition Temperatures for Some Homopolymers with Saturated Carbon Chain Backbone
Source: MDPI journal article supplement (doi:10.3390/polym13234151), 2021-11-27
Supplement: s1 [file s1]

## Supplementary Materials

# Artificial Neural Network modeling of glass transition temperatures for some homopolymers with saturated carbon chain backbone

Elena-Luiza Epure\*, Sîziana Diana Oniciuc, Nicolae Hurduc and Elena Niculina Drăgoi \*

“Gheorghe Asachi” Technical University, Faculty of Chemical Engineering and Environmental Protection, Iasi, 73 Prof. Dr. Doc. D. Mangeron Street, 700050, Romania

\* Correspondence: lepure@tuiasi.ro (E-L.E.), elenan.dragoi@gmail.com (E.N.D.);

**Table S1.** The experimental Tg values of the polymers used as learning and testing data

| Index of polymer                     | Polymer                       | Tg exp (K) | Reference |
|--------------------------------------|-------------------------------|------------|-----------|
| <b>Polyolefins</b>                   |                               |            |           |
| 1.                                   | polyethylene                  | 148        | [1]       |
| 2.                                   | polypropylene                 | 272        | [1]       |
| 3.                                   | poly(1-butene)                | 249        | [2]       |
| 4.                                   | polyisobutylene               | 209        | [2]       |
| 5.                                   | poly(4-methyl-1-pentene)      | 303        | [3]       |
| 6.                                   | poly(1-hexene)                | 231        | [4]       |
| 7.                                   | poly(1-heptene)               | 228        | [5]       |
| 8.                                   | poly(1-octene)                | 208        | [5]       |
| 9.                                   | poly(1-nonene)                | 226        | [5]       |
| 10.                                  | poly(1-decene)                | 240        | [5]       |
| 11.                                  | poly(1-undecene)              | 236        | [5]       |
| 12.                                  | poly(1-dodecene)              | 237        | [5]       |
| 13.                                  | poly(1-hexadecene)            | 309        | [5]       |
| 14.                                  | poly(1-octadecene)            | 328        | [2]       |
| 15.                                  | poly(vinyl cyclopentane)      | 343        | [5]       |
| 16.                                  | poly(vinyl cyclohexane)       | 400        | [5]       |
| 17.                                  | poly(1,2-butadiene)           | 258        | [5]       |
| 18.                                  | poly(4-cyclohexyl-1-butene)   | 313        | [5]       |
| 19.                                  | poly(4-phenyl-1-butene)       | 283        | [5]       |
| 20.                                  | poly(3-methyl-1-butene)       | 323        | [5]       |
| 21.                                  | poly(5-methyl-1-hexene)       | 258        | [5]       |
| <b>Halogenated polyolefins</b>       |                               |            |           |
| 1.                                   | poly(chlorotrifluoroethylene) | 373        | [1]       |
| 2.                                   | poly(tetrafluoroethylene)     | 170        | [6]       |
| 3.                                   | poly(vinyl chloride)          | 354        | [5]       |
| 4.                                   | poly(fluoroethylene)          | 314        | [1]       |
| 5.                                   | poly(vinylidene chloride)     | 255        | [1]       |
| 6.                                   | poly(1,1-difluoroethylene)    | 233        | [1]       |
| <b>Polystyrene, Polyhalostyrenes</b> |                               |            |           |
| 1.                                   | polystyrene                   | 358        | [5]       |
| 2.                                   | poly(4-fluorostyrene)         | 368        | [2]       |

|     |                           |     |     |
|-----|---------------------------|-----|-----|
| 3.  | poly(2-chlorostyrene)     | 392 | [2] |
| 4.  | poly(3-chlorostyrene)     | 363 | [2] |
| 5.  | poly(4-chlorostyrene)     | 383 | [2] |
| 6.  | poly(2,6-dichlorostyrene) | 440 | [2] |
| 7.  | poly(4-methylstyrene)     | 370 | [2] |
| 8.  | poly(2,4-dimethylstyrene) | 385 | [2] |
| 9.  | poly(2,5-dimethylstyrene) | 416 | [2] |
| 10. | poly(3,5-dimethylstyrene) | 377 | [2] |
| 11. | poly(4-tert-butylstyrene) | 400 | [2] |

### Polyacrylates

|     |                              |     |       |
|-----|------------------------------|-----|-------|
| 1.  | poly(acrylic acid)           | 379 | [2]   |
| 2.  | poly(methyl acrylate)        | 283 | [2]   |
| 3.  | poly(ethyl acrylate)         | 249 | [2,5] |
| 4.  | poly(n-propyl acrylate)      | 228 | [7]   |
| 5.  | poly(isopropyl acrylate)     | 262 | [2]   |
| 6.  | poly(n-butyl acrylate)       | 230 | [5]   |
| 7.  | poly(sec-butyl acrylate)     | 247 | [2]   |
| 8.  | poly(tert-butyl acrylate)    | 316 | [2]   |
| 9.  | poly(isobutyl acrylate)      | 249 | [2]   |
| 10. | poly(n-hexyl acrylate)       | 216 | [2]   |
| 11. | poly(cyclohexyl acrylate)    | 292 | [2]   |
| 12. | poly(heptyl acrylate)        | 213 | [7]   |
| 13. | poly(dodecyl acrylate)       | 270 | [2]   |
| 14. | poly(hexadecyl acrylate)     | 308 | [2,7] |
| 15. | poly(2-ethylhexyl acrylate)  | 223 | [2,7] |
| 16. | poly(benzylacrylate)         | 279 | [2]   |
| 17. | poly(2-cyanoethyl acrylate)  | 277 | [2]   |
| 18. | poly(2-ethoxyethyl acrylate) | 223 | [2,7] |

### Polymethacrylates

|     |                                              |     |       |
|-----|----------------------------------------------|-----|-------|
| 1.  | poly(methacrylic acid)                       | 501 | [2]   |
| 2.  | poly(benzyl methacrylate)                    | 327 | [2]   |
| 3.  | poly(methyl methacrylate)                    | 378 | [5]   |
| 4.  | poly(ethyl methacrylate)                     | 338 | [2]   |
| 5.  | poly(n-propyl methacrylate)                  | 308 | [5]   |
| 6.  | poly(isopropyl methacrylate)                 | 354 | [2]   |
| 7.  | poly(n-butyl methacrylate)                   | 294 | [2]   |
| 8.  | poly(isobutyl methacrylate)                  | 326 | [2]   |
| 9.  | poly(sec-butyl methacrylate)                 | 331 | [5]   |
| 10. | poly(tert-butyl methacrylate)                | 357 | [5]   |
| 11. | poly(n-hexyl methacrylate)                   | 268 | [2]   |
| 12. | poly(cyclohexyl methacrylate)                | 365 | [2]   |
| 13. | poly(octyl methacrylate)                     | 203 | [5]   |
| 14. | poly(dodecyl methacrylate)                   | 208 | [2,7] |
| 15. | poly(hexadecyl methacrylate)                 | 288 | [2]   |
| 16. | poly(octadecyl methacrylate)                 | 173 | [2]   |
| 17. | poly(2-hydroxyethyl methacrylate)            | 330 | [2]   |
| 18. | poly(2-hydroxypropyl methacrylate)           | 349 | [2]   |
| 19. | poly(2-phenylethyl methacrylate)             | 300 | [5]   |
| 20. | poly(phenyl methacrylate)                    | 383 | [2]   |
| 21. | poly(4-tert-butylcyclohexyl methacrylate)    | 371 | [8]   |
| 22. | poly(2,2,3,3-tetrafluoropropyl methacrylate) | 337 | [5]   |
| 23. | poly(2-tert-butylaminoethyl methacrylate)    | 306 | [2]   |

|     |                                             |     |       |
|-----|---------------------------------------------|-----|-------|
| 24. | poly(2-(diethylamino)ethyl methacrylate)    | 293 | [2]   |
| 25. | poly(2-ethylhexyl methacrylate)             | 263 | [2,7] |
| 26. | poly(dimethylaminoethyl methacrylate)       | 292 | [2]   |
| 27. | poly(2-ethylbutyl methacrylate)             | 284 | [7]   |
| 28. | poly(3,3,5-trimethylcyclohexylmethacrylate) | 352 | [7]   |

#### Polycyanoacrylates

|    |                              |     |        |
|----|------------------------------|-----|--------|
| 1. | poly(methyl cyanoacrylate)   | 369 | [5,9]  |
| 2. | poly(ethyl cyanoacrylate)    | 406 | [5]    |
| 3. | poly(isobutyl cyanoacrylate) | 403 | [5,10] |
| 4. | poly(2-octyl cyanoacrylate)  | 283 | [10]   |

#### Polymers with hydroxyl groups. Polyethers

|     |                               |     |      |
|-----|-------------------------------|-----|------|
| 1.  | poly (oxymethylene)           | 191 | [5]  |
| 2.  | poly(ethylene glycol)         | 213 | [11] |
| 3.  | poly(epichlorohydrin)         | 251 | [2]  |
| 4.  | poly(ethyl vinyl ether)       | 233 | [2]  |
| 5.  | poly(tetrahydrofuran)         | 189 | [2]  |
| 6.  | poly(trimethylene oxide)      | 197 | [12] |
| 7.  | poly(propylene oxide)         | 198 | [2]  |
| 8.  | poly (cyclohexyl vinyl ether) | 354 | [2]  |
| 9.  | poly(vinyl alcohol)           | 358 | [5]  |
| 10. | poly(4-vinylphenol)           | 428 | [2]  |

#### Others polymers

|    |                              |     |      |
|----|------------------------------|-----|------|
| 1. | poly(2-vinylpyridine)        | 357 | [5]  |
| 2. | poly(N-isopropylacrylamide)  | 358 | [2]  |
| 3. | poly(N,N-dimethylacrylamide) | 362 | [2]  |
| 4. | polyacrylamide               | 438 | [2]  |
| 5. | poly(N-tert-butylacrylamide) | 415 | [13] |
| 6. | polyacrylonitrile            | 398 | [2]  |

**Table S2.** The dataset used for validating the ANN model.

| Nr.crt. | Polymer                    | Family                  | Tg exp (K) | Reference |
|---------|----------------------------|-------------------------|------------|-----------|
| 1.      | poly(1-pentene)            | polyolefins             | 221        | [14]      |
| 2.      | poly(perfluoropropylene)   | halogenated polyolefins | 284        | [15]      |
| 3.      | poly( o-methylstyrene)     | polystyrene             | 388        | [15]      |
| 4.      | poly( α-methylstyrene)     | polystyrene             | 448        | [15]      |
| 5.      | poly(n-nonyl acrylate)     | polyacrylates           | 184        | [14]      |
| 6.      | poly(n-decyl methacrylate) | polymethacrylates       | 203        | [14]      |
| 7.      | poly(vinyl butyl ether)    | polyethers              | 223        | [15]      |
| 8.      | poly(vinyl propyl ether)   | polyethers              | 246        | [16]      |

**Table S3.** The ANN model obtained for all homopolymers considered.

|                                                                                                                                                                                                                                                                                                                                                                                                                                                                                                                                                                                                                                                                                                                                                                                                                                                                                                                                                                                                                                                                                                                                                                                                                     |      |
|---------------------------------------------------------------------------------------------------------------------------------------------------------------------------------------------------------------------------------------------------------------------------------------------------------------------------------------------------------------------------------------------------------------------------------------------------------------------------------------------------------------------------------------------------------------------------------------------------------------------------------------------------------------------------------------------------------------------------------------------------------------------------------------------------------------------------------------------------------------------------------------------------------------------------------------------------------------------------------------------------------------------------------------------------------------------------------------------------------------------------------------------------------------------------------------------------------------------|------|
| INP_0= - 1E-20+0.001 +(CarbonAtoms - 1)*(0.999-0.001) /(22 -1)                                                                                                                                                                                                                                                                                                                                                                                                                                                                                                                                                                                                                                                                                                                                                                                                                                                                                                                                                                                                                                                                                                                                                      | (1)  |
| INP_1= - 1E-20+0.001 +(HydrogenAtoms - 0)*(0.999-0.001) /(42 -0)                                                                                                                                                                                                                                                                                                                                                                                                                                                                                                                                                                                                                                                                                                                                                                                                                                                                                                                                                                                                                                                                                                                                                    | (2)  |
| INP_2= - 1E-20+0.001 +(OxygenAtoms - 0)*(0.999-0.001) /(3 -0)                                                                                                                                                                                                                                                                                                                                                                                                                                                                                                                                                                                                                                                                                                                                                                                                                                                                                                                                                                                                                                                                                                                                                       | (3)  |
| INP_3= - 1E-20+0.001 +(NitrogenAtoms - 0)*(0.999-0.001) /(1 -0)                                                                                                                                                                                                                                                                                                                                                                                                                                                                                                                                                                                                                                                                                                                                                                                                                                                                                                                                                                                                                                                                                                                                                     | (4)  |
| INP_4= - 1E-20+0.001 +(FlourAroms - 0)*(0.999-0.001) /(4 -0)                                                                                                                                                                                                                                                                                                                                                                                                                                                                                                                                                                                                                                                                                                                                                                                                                                                                                                                                                                                                                                                                                                                                                        | (5)  |
| INP_5= - 1E-20+0.001 +(ChlorAtoms - 0)*(0.999-0.001) /(2 -0)                                                                                                                                                                                                                                                                                                                                                                                                                                                                                                                                                                                                                                                                                                                                                                                                                                                                                                                                                                                                                                                                                                                                                        | (6)  |
| INP_6= - 1E-20+0.001 +(MCB - 26)*(0.999-0.001) /(116.5 -26)                                                                                                                                                                                                                                                                                                                                                                                                                                                                                                                                                                                                                                                                                                                                                                                                                                                                                                                                                                                                                                                                                                                                                         | (7)  |
| INP_7= - 1E-20+0.001 +(MCB-H - 8)*(0.999-0.001) /(116.5 -8)                                                                                                                                                                                                                                                                                                                                                                                                                                                                                                                                                                                                                                                                                                                                                                                                                                                                                                                                                                                                                                                                                                                                                         | (8)  |
| INP_8= - 1E-20+0.001 +(liniar - 0)*(0.999-0.001) /(2 -0)                                                                                                                                                                                                                                                                                                                                                                                                                                                                                                                                                                                                                                                                                                                                                                                                                                                                                                                                                                                                                                                                                                                                                            | (9)  |
| INP_9= - 1E-20+0.001 +(cicCL - 0)*(0.999-0.001) /(1 -0)                                                                                                                                                                                                                                                                                                                                                                                                                                                                                                                                                                                                                                                                                                                                                                                                                                                                                                                                                                                                                                                                                                                                                             | (10) |
| INP_10= - 1E-20+0.001 +(arCL - 0)*(0.999-0.001) /(1 -0)                                                                                                                                                                                                                                                                                                                                                                                                                                                                                                                                                                                                                                                                                                                                                                                                                                                                                                                                                                                                                                                                                                                                                             | (11) |
| INP_11= - 1E-20+0.001 +(hCB - 0)*(0.999-0.001) /(1 -0)                                                                                                                                                                                                                                                                                                                                                                                                                                                                                                                                                                                                                                                                                                                                                                                                                                                                                                                                                                                                                                                                                                                                                              | (12) |
| INP_12= - 1E-20+0.001 +(hCL - 0)*(0.999-0.001) /(1 -0)                                                                                                                                                                                                                                                                                                                                                                                                                                                                                                                                                                                                                                                                                                                                                                                                                                                                                                                                                                                                                                                                                                                                                              | (13) |
| INP_13= - 1E-20+0.001 +(0xConectivity- 1.41)*(0.999-0.001) /(17.51 -1.41)                                                                                                                                                                                                                                                                                                                                                                                                                                                                                                                                                                                                                                                                                                                                                                                                                                                                                                                                                                                                                                                                                                                                           | (14) |
| INP_14= - 1E-20+0.001 +(1xConectivity - 1)*(0.999-0.001) /(23.65 -1)                                                                                                                                                                                                                                                                                                                                                                                                                                                                                                                                                                                                                                                                                                                                                                                                                                                                                                                                                                                                                                                                                                                                                | (15) |
| INP_15= - 1E-20+0.001 +(vdW - 4.75)*(0.999-0.001) /(228.95 -4.75)                                                                                                                                                                                                                                                                                                                                                                                                                                                                                                                                                                                                                                                                                                                                                                                                                                                                                                                                                                                                                                                                                                                                                   | (16) |
| INP_16= - 1E-20+0.001 +(1KMolarVolume - 19.22)*(0.999-0.001) /(297.72 -19.22)                                                                                                                                                                                                                                                                                                                                                                                                                                                                                                                                                                                                                                                                                                                                                                                                                                                                                                                                                                                                                                                                                                                                       | (17) |
| INP_17= - 1E-20+0.001 +(298KMolarVolume - 22.99)*(0.999-0.001) /(361.67 -22.99)                                                                                                                                                                                                                                                                                                                                                                                                                                                                                                                                                                                                                                                                                                                                                                                                                                                                                                                                                                                                                                                                                                                                     | (18) |
| INP_18= - 1E-20+0.001 +(density - 0.85)*(0.999-0.001) /(2.05 -0.85)                                                                                                                                                                                                                                                                                                                                                                                                                                                                                                                                                                                                                                                                                                                                                                                                                                                                                                                                                                                                                                                                                                                                                 | (19) |
| INP_19= - 1E-20+0.001 +(CohesiveEnergy - 8.089)*(0.999-0.001) /(119.098 -8.089)                                                                                                                                                                                                                                                                                                                                                                                                                                                                                                                                                                                                                                                                                                                                                                                                                                                                                                                                                                                                                                                                                                                                     | (20) |
| INP_20= - 1E-20+0.001 +(Entanglement - 1926)*(0.999-0.001) /(134132 -1926)                                                                                                                                                                                                                                                                                                                                                                                                                                                                                                                                                                                                                                                                                                                                                                                                                                                                                                                                                                                                                                                                                                                                          | (21) |
| H1_0=math.sin(+INP_0*0.544118033964117+INP_1*0.296772575159206+INP_2*-<br>0.461118930806975+INP_3*-<br>0.80923201982167+INP_4*0.867751477630028+INP_5*0.772613075831481+<br>INP_6*0.624272423518401+INP_7*-0.256325474010821+INP_8*-<br>0.309944358465243+INP_9*-0.0523404383832098+INP_10*-0.79279679144531+INP_11*-<br>0.90163550204181+INP_12*0.186024552652494+INP_13*-0.453917196644759+INP_14*-<br>0.00835685757034888+INP_15*0.0444918686935694+INP_16*0.503578845034187+INP_17*-<br>0.384477748197456+INP_18*-0.741268655224187+INP_19*-0.710252762299149+INP_20*-<br>0.678021701612108+-0.348272897544441)                                                                                                                                                                                                                                                                                                                                                                                                                                                                                                                                                                                                 | (22) |
| H1_1=((math.sqrt(math.pow(+INP_0*-<br>0.0858506360166572+INP_1*0.984645446398686+INP_2*0.226241001048936+<br>INP_3*0.592189048208227+INP_4*0.315858685205579+INP_5*-0.264796635800749+INP_6*-<br>0.0641376465815047+INP_7*0.507587883242079+INP_8*-0.0458796039048231+INP_9*-<br>0.945010728802051+INP_10*0.796790954019358+INP_11*0.300109760761138+INP_12*-<br>0.263023469335923+INP_13*0.539173549148303+INP_14*-<br>0.252898642903707+INP_15*0.215614323985436+INP_16*0.108791471901005+INP_17*-<br>0.575766678803576+INP_18*-0.335848967425074+INP_19*0.0220135960165123+INP_20*-<br>0.438561000238494+0.876196773193087, 2) + 1.0) - 1.0) / 2.0 + INP_0*-<br>0.0858506360166572+INP_1*0.984645446398686+INP_2*0.226241001048936+<br>INP_3*0.592189048208227+INP_4*0.315858685205579+INP_5*-0.264796635800749+INP_6*-<br>0.0641376465815047+INP_7*0.507587883242079+INP_8*-0.0458796039048231+INP_9*-<br>0.945010728802051+INP_10*0.796790954019358+INP_11*0.300109760761138+INP_12*-<br>0.263023469335923+INP_13*0.539173549148303+INP_14*-<br>0.252898642903707+INP_15*0.215614323985436+INP_16*0.108791471901005+INP_17*-<br>0.575766678803576+INP_18*-0.335848967425074+INP_19*0.0220135960165123+INP_20*- | (23) |

---

0.438561000238494+0.876196773193087)

H1\_2=max(0, +INP\_0\*-0.0617466229099669+INP\_1\*-  
0.513938309299112+INP\_2\*0.852930598164218+INP\_3\*0.320097301167876+INP\_4\*-  
0.188259803749279+INP\_5\*-0.565019995860616+INP\_6\*0.595413011965646+INP\_7\*-  
0.528003714700397+INP\_8\*0.300099967291629+INP\_9\*0.3269811415883+INP\_10\*-  
0.518486845145325+INP\_11\*0.511345684282431+INP\_12\*0.0173126291726122+  
INP\_13\*0.252502578031333+INP\_14\*0.763151914397945+INP\_15\*-  
0.740341906289209+INP\_16\*0.733733450016088+INP\_17\*-  
0.390569334794352+INP\_18\*0.326451021168223+INP\_19\*0.0512314716264531+INP\_20\*0.9  
70935988012847+-0.379816127497597)

(24)

---

H1\_3=max(0, +INP\_0\*0.251325131076016+INP\_1\*0.733252093823446+INP\_2\*-  
0.914273967786097+INP\_3\*0.0706894099604163+INP\_4\*-  
0.643131686700084+INP\_5\*0.648492956530627+INP\_6\*0.313849027566571+  
INP\_7\*0.512316739415225+INP\_8\*0.309558430344284+INP\_9\*0.56037521974103+INP\_10\*-  
0.135646917156795+INP\_11\*-0.471224746725786+INP\_12\*0.00402898241176353+INP\_13\*-  
0.765585265017006+INP\_14\*0.102439603569315+INP\_15\*-0.877832990710656+INP\_16\*-  
0.992166160404062+INP\_17\*0.914592215455382+INP\_18\*-0.620233399468425+INP\_19\*-  
0.45788393027627+INP\_20\*0.702962238948209+0.235371625639954)

(25)

---

H1\_4=math.exp(-math.pow(-(INP\_0\*0.259811423681874+INP\_1\*-0.34849261239678+  
INP\_2\*-0.621987388597616+INP\_3\*-  
0.114861640279794+INP\_4\*0.846994671405101+INP\_5\*-0.862629829327588+INP\_6\*-  
0.481480224445337+INP\_7\*-  
0.408832484298989+INP\_8\*0.431302793050971+INP\_9\*0.511664918385287+INP\_10\*-  
0.490669801410196+INP\_11\*-0.0156375070074777+INP\_12\*0.421550034123568+INP\_13\*-  
0.132391384285057+INP\_14\*-0.104625200662426+INP\_15\*-0.670773667632673+INP\_16\*-  
0.427121143765862+INP\_17\*0.302159948768932+INP\_18\*0.269347757078597+INP\_19\*-  
0.295943606400851+INP\_20\*0.149878613016874+-0.23607923464563), 2.0))

(26)

---

H1\_5=if((+INP\_0\*-0.257142883471411+INP\_1\*-  
0.95883667915189+INP\_2\*0.26637878979456+INP\_3\*0.849509683456387+  
INP\_4\*0.134652736795476+INP\_5\*-0.445959419988526+INP\_6\*-  
0.733867809392854+INP\_7\*0.694400212738213+INP\_8\*0.564565808158011+INP\_9\*-  
0.901316483725244+INP\_10\*0.527228429936051+INP\_11\*-0.631443262118635+INP\_12\*-  
0.160654672207758+INP\_13\*-0.0641057318280757+INP\_14\*0.570546973372971+INP\_15\*-  
0.3741120021697+INP\_16\*-0.00849712043509802+INP\_17\*-  
0.222949439894773+INP\_18\*0.77170636410642+INP\_19\*-0.12424419376721+INP\_20\*-  
0.403498397922002+0.319327922334706)<0): 0.01\*(+INP\_0\*-0.257142883471411+INP\_1\*-  
0.95883667915189+INP\_2\*0.26637878979456+INP\_3\*0.849509683456387+INP\_4\*0.1346527  
36795476+INP\_5\*-0.445959419988526+INP\_6\*-  
0.733867809392854+INP\_7\*0.694400212738213+INP\_8\*0.564565808158011+INP\_9\*-  
0.901316483725244+INP\_10\*0.527228429936051+INP\_11\*-0.631443262118635+INP\_12\*-  
0.160654672207758+INP\_13\*-0.0641057318280757+INP\_14\*0.570546973372971+INP\_15\*-  
0.3741120021697+INP\_16\*-0.00849712043509802+INP\_17\*-  
0.222949439894773+INP\_18\*0.77170636410642+INP\_19\*-0.12424419376721+INP\_20\*-  
0.403498397922002+0.319327922334706)  
else: (+INP\_0\*-0.257142883471411+INP\_1\*-  
0.95883667915189+INP\_2\*0.26637878979456+INP\_3\*0.849509683456387+  
INP\_4\*0.134652736795476+INP\_5\*-0.445959419988526+INP\_6\*-  
0.733867809392854+INP\_7\*0.694400212738213+INP\_8\*0.564565808158011+INP\_9\*-  
0.901316483725244+INP\_10\*0.527228429936051+INP\_11\*-0.631443262118635+INP\_12\*-  
0.160654672207758+INP\_13\*-0.0641057318280757+INP\_14\*0.570546973372971+INP\_15\*-  
0.3741120021697+INP\_16\*-0.00849712043509802+INP\_17\*-

(27)

$$\begin{aligned}
&0.222949439894773+\text{INP\_18}*0.77170636410642+\text{INP\_19}*-0.12424419376721+\text{INP\_20}*- \\
&0.403498397922002+0.319327922334706) \\
&\text{H1\_6}=(2.0/(1.0+\text{math.exp}(-2*(+\text{INP\_0}- \\
&0.167845999124169+\text{INP\_1}*0.510510063134233+\text{INP\_2}*0.887363660199696+ \\
&\text{INP\_3}*0.273732286001817+\text{INP\_4}*0.0964331582734111+\text{INP\_5}- \\
&0.42633015523921+\text{INP\_6}*0.0637683883420247+\text{INP\_7}*0.719825736223102+\text{INP\_8}- \\
&0.76619521781668+\text{INP\_9}*0.489679817692855+\text{INP\_10}*0.0409930345792713+\text{INP\_11}- \\
&0.611323020156219+\text{INP\_12}*0.824030260922289+\text{INP\_13}*0.609655145559236+\text{INP\_14}- \\
&0.727311891631199+\text{INP\_15}*0.464382144117735+\text{INP\_16}*0.160804892538074+\text{INP\_17}- \\
&0.763602928439615+\text{INP\_18}*0.794358150535703+\text{INP\_19}*0.748882843522789+\text{INP\_20}- \\
&0.429709120008987+0.128538574482799))) - 1) \\
&\text{OUTPUT\_1}=\text{math.abs}(+\text{H1\_0}*0.69624012661736+\text{H1\_1}*0.351211305488293+ \\
&\text{H1\_2}*0.447268804289353+\text{H1\_3}*0.433966914489984+\text{H1\_4}*0.232405907575948+\text{H1\_5}- \\
&0.676654671979226+\text{H1\_6}*0.326955002331831+-0.431485658475907) \\
&\text{OUTPUT\_DENORM1}=(\text{OUTPUT\_1}+1\text{E}-20-0.001)*(501-148)/(0.999-0.001)+148
\end{aligned}$$

(28)

(29)

(30)

## References

1. Fox, R.B. Glass transition temperature for selected polymers. *CRC Handbook of Chemistry and Physics* **2017**, 87, 2006-2007.
2. sigmaaldrich. Availabe online: <https://www.sigmaaldrich.com/> (accessed on 10.30.2021).
3. Markova, S.Y.; Gries, T.; Teplyakov, V.V. Poly (4-methyl-1-pentene) as a semicrystalline polymeric matrix for gas separating membranes. *Journal of Membrane Science* **2020**, 598, 117754.
4. Nouri-Ahangarani, F.; Bahri-Laleh, N.; Nekoomanesh-Haghighi, M.; Karbalaie, M. Synthesis of highly isotactic poly 1-hexene using Fe-doped Mg (OEt) 2/TiCl4/ED Ziegler–Natta catalytic system. *Designed Monomers and Polymers* **2016**, 19, 394-405.
5. Ellis, B.; Smith, R. *Polymers: a property database*; CRC press: 2008.
6. Calleja, G.; Jourdan, A.; Ameduri, B.; Habas, J.-P. Where is the glass transition temperature of poly (tetrafluoroethylene)? A new approach by dynamic rheometry and mechanical tests. *European polymer journal* **2013**, 49, 2214-2222.
7. Koleske, J.V. Paint and coating testing manual: of the Gardner-Sward handbook.
8. Gargallo, L.; Russo, M. Effect of structure on glass transition temperatures of poly (methacrylic ester) s with bulky side groups. *Die Makromolekulare Chemie: Macromolecular Chemistry and Physics* **1975**, 176, 2735-2744.
9. Cheung, K.H.; Guthrie, J.; Otterburn, M.S.; Rooney, J.M. The dynamic mechanical properties of poly (alkyl 2-cyanoacrylates). *Die Makromolekulare Chemie: Macromolecular Chemistry and Physics* **1987**, 188, 3041-3046.
10. Duffy, C.; Zetterlund, P.B.; Aldabbagh, F. Radical polymerization of alkyl 2-cyanoacrylates. *Molecules* **2018**, 23, 465.
11. Törmälä, P. Determination of glass transition temperature of poly (ethylene glycol) by spin probe technique. *European Polymer Journal* **1974**, 10, 519-521.
12. Mark, J.; Chiu, D. Dipole moments of poly (trimethylene oxide) chains. *The Journal of Chemical Physics* **1977**, 66, 1901-1904.
13. Garay, M.T.; Ruiz, L.; Marín, J.R.; Laza, J.M.; Rodriguez, M.; León, L.M. Associative and segregative phase separations of poly (N-tert-butylacrylamide)/poly (acrylic acid) mixtures. Effect of solvent. *Colloid and Polymer Science* **2010**, 288, 1593-1599.
14. van Krevelen; D.W., te Nijenhuis, K. Properties of Polymers: Their Correlation with Chemical Structure; Their Numerical Estimation and Prediction from Additive Group Contributions, 4<sup>th</sup> ed., Elsevier, Amsterdam, The Netherlands, 2009; p.143
15. Shen, M.C.; Eisenberg, A. Glass transitions in polymers, *Progress in Solid State Chemistry*, 1967, 3, 407-481

- 16 Tighe, B.J.; Mann, A. Adhesive and interfacial phenomena in wound healing, *Advanced wound repair therapies*, Farrar, D.Woodhead publishing Limited, Cambridge, UK, 2011; p 262
